# Supplementary material for: Zakon Krzyżacki a powstanie państwa pruskiego
Source: MDPI journal article supplement (doi:10.3390/ijms22147590), 1977-01-01

C3 GRN HPX S100A8

EPCAM

CFTR

CFTR

CFTR

PM

FLG2

LANCL1

CFTR

Endosome

CFTR

Golgi

CFTR

ctr

ER

CIQBP

Mitochondrion

PTMA

ctr

ctr

Nucleus

Cytoplasm

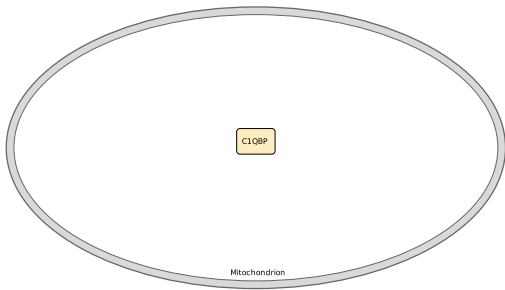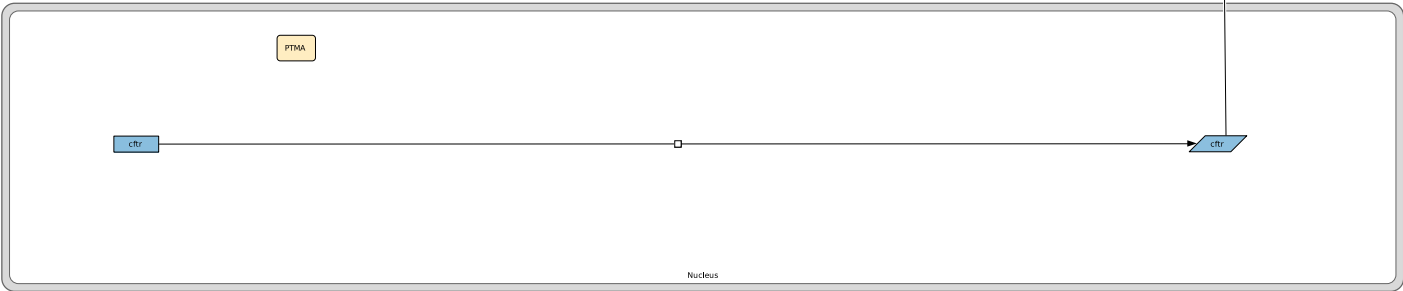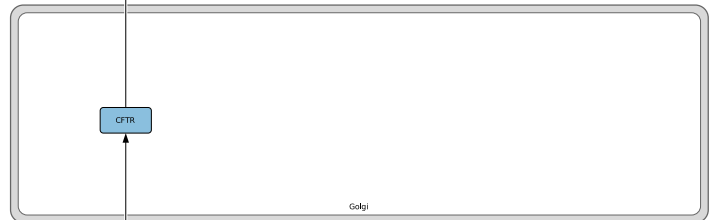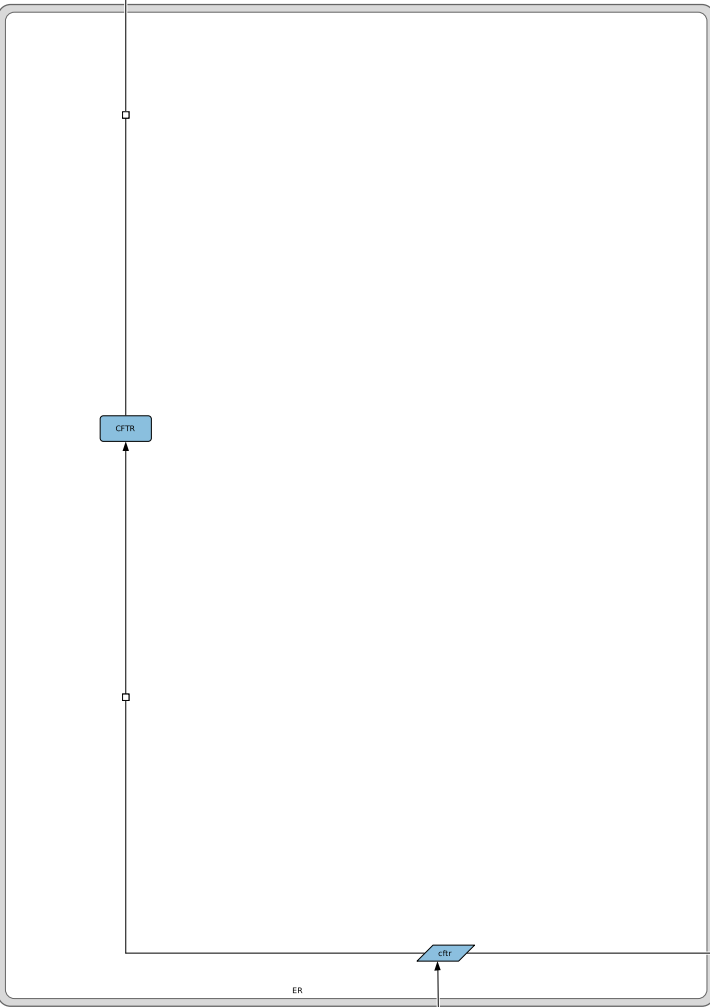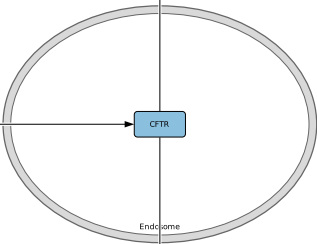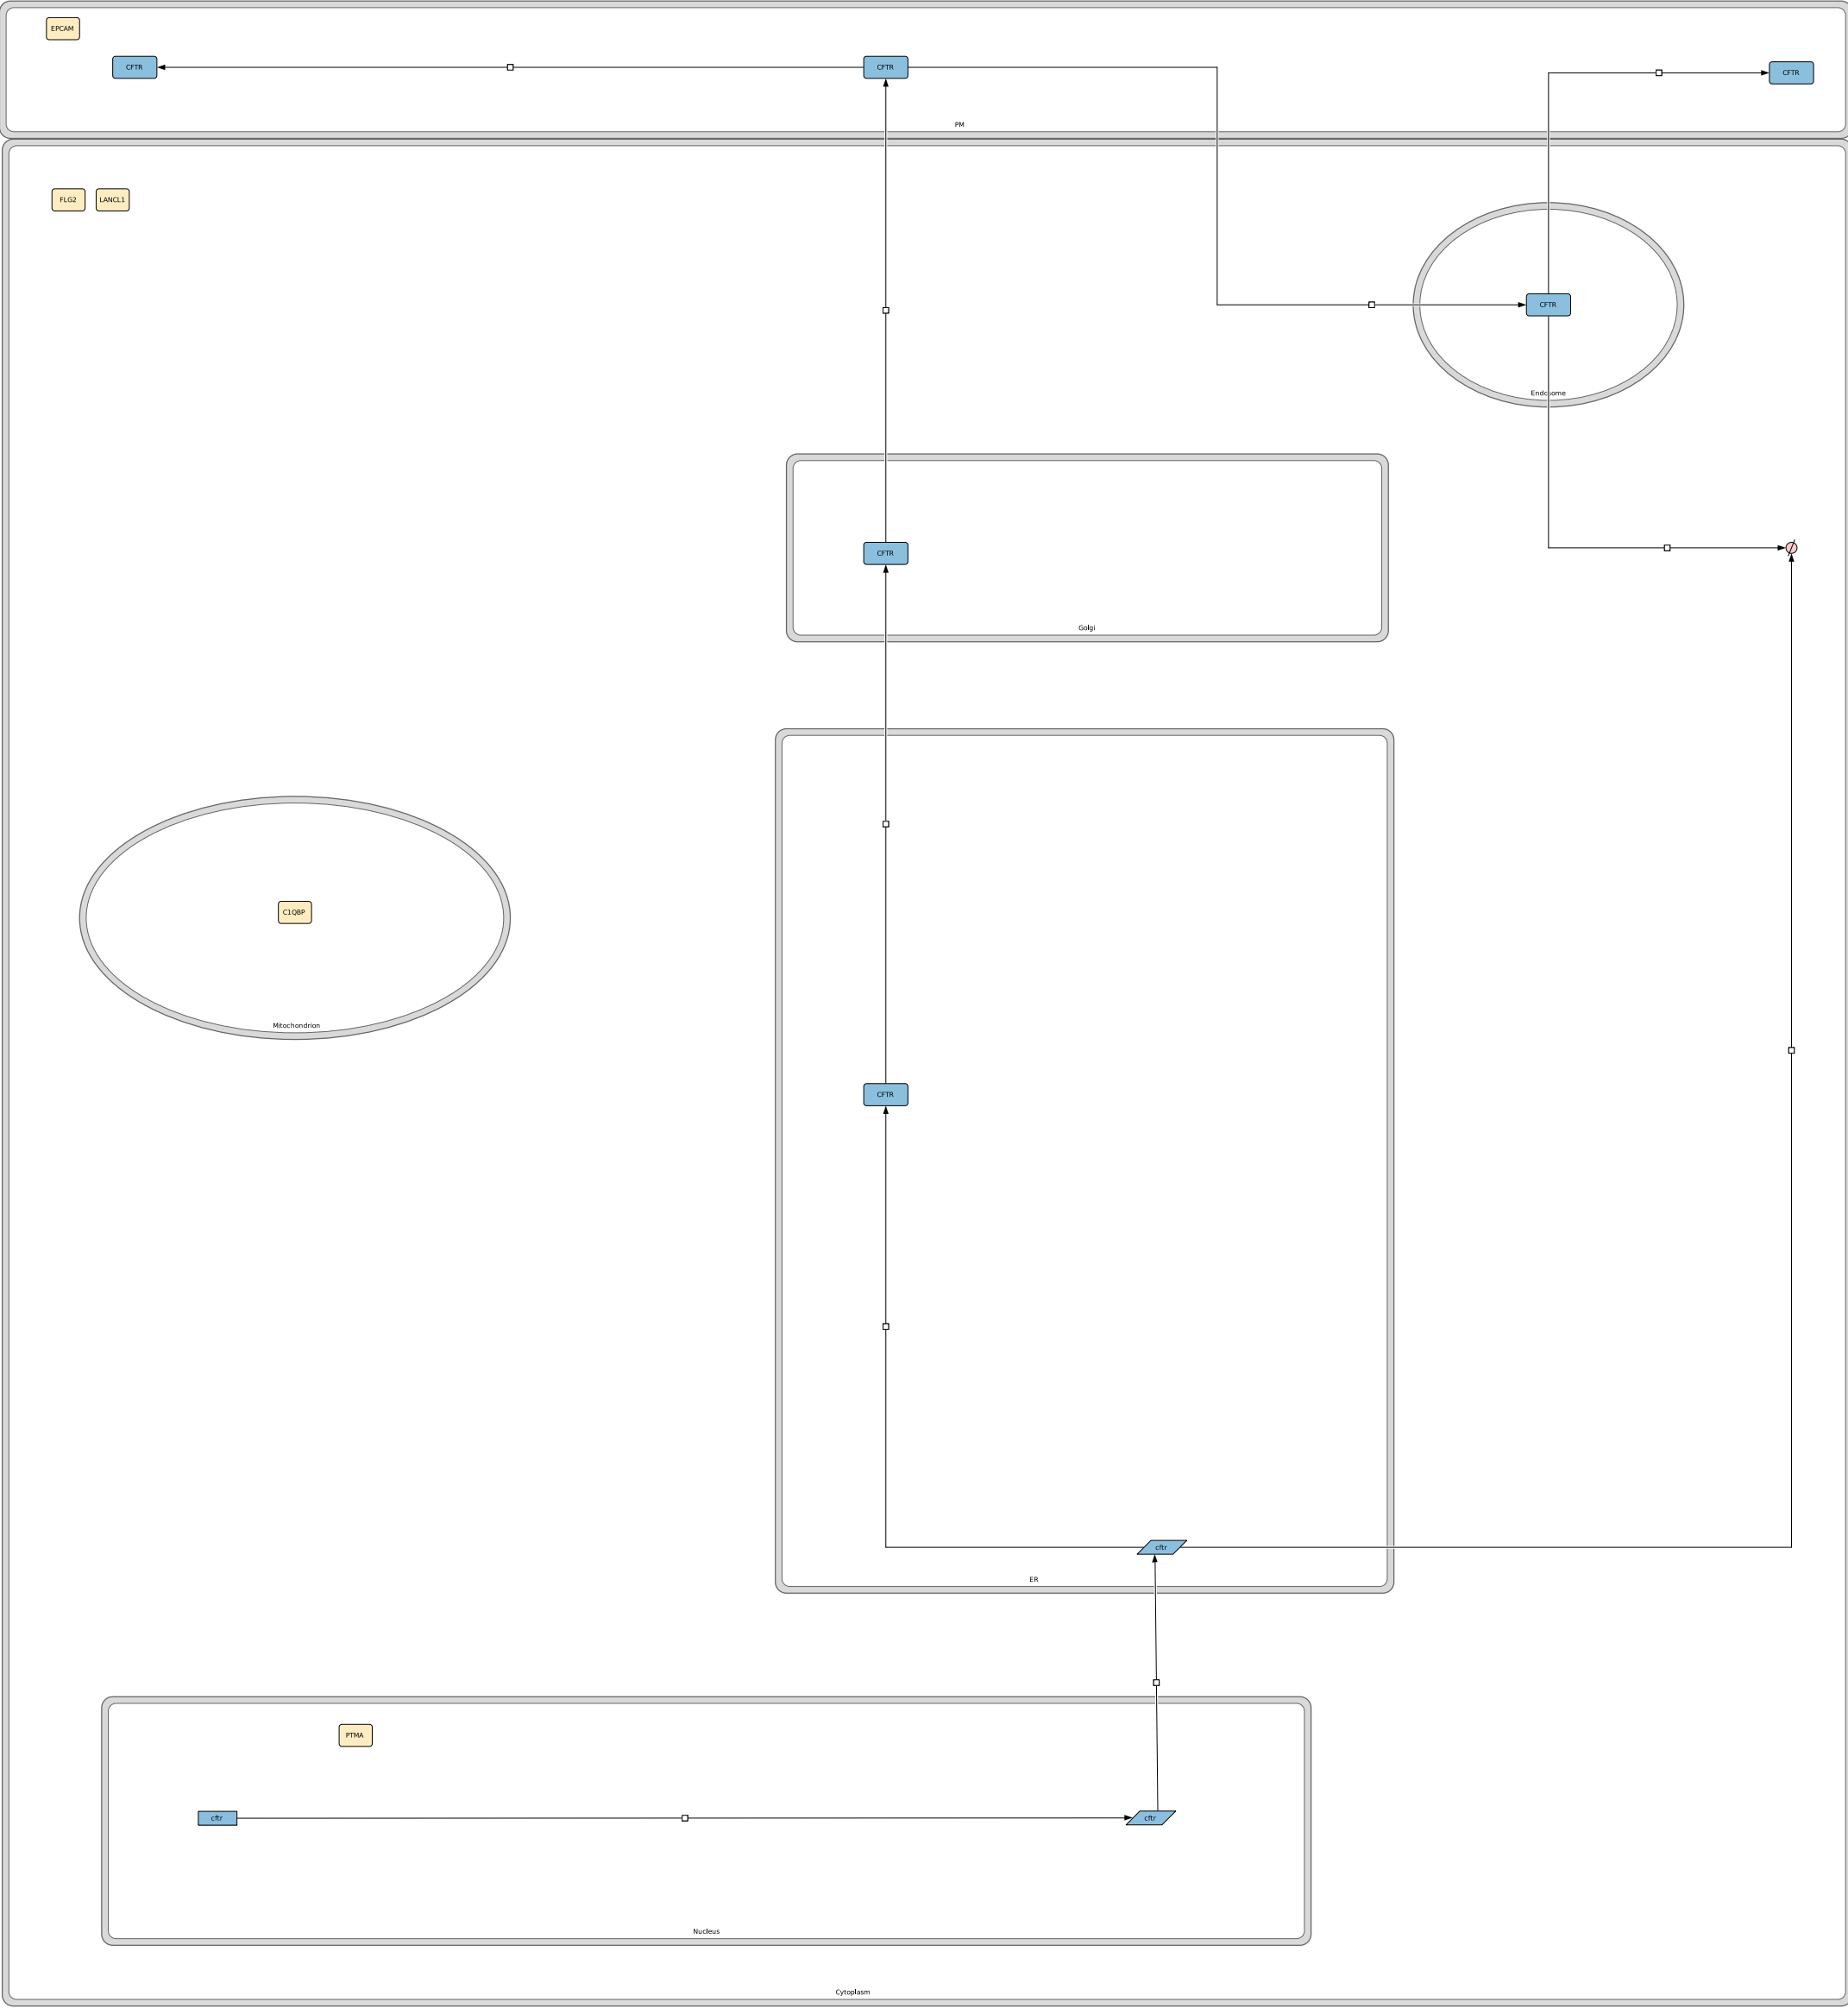

Supplement: s1 [file s1]
